# Supplementary material for: Bacterial Metabarcoding of Raw Palm Sap Samples From Bangladesh With Nanopore Sequencing
Source: Preprints.org preprint supplement (doi:10.20944/preprints202403.1372.v1), 2024-03-22
Supplement: Supplementary file 3 [file supplementary]

## Sheet: Munka1
most abundant genera/barcode		Genus	read_count	%	all_reads_classified	135427		genera	Barcode01	Barcode02	Barcode03	Barcode04	Barcode05	Barcode06	Barcode07	Barcode08	Barcode09	Barcode10	Barcode11	Barcode12	Barcode13	Barcode14	Barcode15
	Barcode01	Leuconostoc	126556	93.4496				Leuconostoc	93	84.0017	89	88	31	60	98	90	78	97	87	97	72	92	24
		Rosenbergiella	2930	2.16353				Lactococcus		10.9717	2	2	61	2		4	4	1	1		10		71
		Acinetobacter	1127	0.832183				Acinetobacter	1	0.94522	2	4		2			4		1
		Pantoea	414	0.3057				Rosenbergiella	2	0.973067
								Enterobacter				1				1	1				1
								Serratia					1	3					1		1
		Genus	read_count	%	all_reads_classified	190326		Streptococcus					1										1
	Barcode02	Leuconostoc	159877	84.0017				Citrobacter						1
		Lactococcus	20882	10.9717				Raoultella						1
		Acinetobacter	1799	0.94522				Pectobacterium						7
		Rosenbergiella	1852	0.973067				Erwinia									2				1
		Streptococcus	409	0.214894				Exiguobacerium									3
		Genus	read_count	%	all_reads_classified	94496
	Barcode03	Leuconostoc	83791	88.6715
		Lactococcus	2119	2.24242
		Acinetobacter	2022	2.13977
		Serratia	442	0.467745
		Genus	read_count	%	all_reads_classified	90926
	Barcode04	Leuconostoc	79678	87.6295
		Lactococcus	2112	2.32277
		Acinetobacter	4086	4.49376
		Enterobacter	522	0.574093
		Genus	read_count	%	all_reads_classified	162263
	Barcode05	Leuconostoc	50293	30.9947
		Lactococcus	98274	60.5646
		Acinetobacter	743	0.457899
		Serratia	1049	0.646481
		Streptococcus	1944	1.19806
		Genus	read_count	%	all_reads_classified	137090
	Barcode06	Leuconostoc	82589	60.2444
		Lactococcus	2557	1.8652
		Acinetobacter	2854	2.08184
		Pectobacterium	9471	6.9086
		Serratia	3482	2.53994
		Enterobacter	525	0.38296
		Citrobacter	972	0.709023
		Raoultella	1834	1.33781
		Kluyvera	447	0.326063
		Huaxiibacter	629	0.458823
		Genus	read_count	%	all_reads_classified	94271
	Barcode07	Leuconostoc	91967	97.556
		Genus	read_count	%	all_reads_classified	125954
	Barcode08	Leuconostoc	113037	89.7447
		Lactococcus	4815	3.82282
		Enterobacter	1258	0.998777
		Genus	read_count	%	all_reads_classified	109810
	Barcode09	Leuconostoc	85752	78.0912
		Lactococcus	4663	4.24643
		Acinetobacter	4005	3.64721
		Enterobacter	1095	0.997177
		Erwinia	1713	1.55997
		Exiguobacerium	3546	3.22921
		Genus	read_count	%	all_reads_classified	136898
	Barcode10	Leuconostoc	133023	97.1694
		Lactococcus	771	0.563193
		Serratia	471	0.344052
		Genus	read_count	%	all_reads_classified	185209
	Barcode11	Leuconostoc	161425	87.1583
		Lactococcus	1681	0.907623
		Acinetobacter	933	0.503755
		Serratia	1949	1.05232
		Enterobacter	560	0.302361
		Genus	read_count	%	all_reads_classified	89330
	Barcode12	Leuconostoc	86816	97.1857
		Genus	read_count	%	all_reads_classified	199157
	Barcode13	Leuconostoc	143893	72.251
		Lactococcus	20394	10.2402
		Serratia	1335	0.670325
		Enterobacter	1054	0.529231
		Erwinia	2486	1.24826
		Genus	read_count	%	all_reads_classified	239184
	Barcode14	Leuconostoc	219456	91.752
		Lactococcus	510	0.213225
		Enterobacter	450	0.18814
		Erwinia	521	0.217824
		Citrobacter	631	0.263814
		Liquorilactobacillus	1079	0.451117
		Genus	read_count	%	all_reads_classified	198149
	Barcode15	Leuconostoc	48011	24.2297
		Lactococcus	140837	71.0763
		Streptococcus	2891	1.459
